# Supplementary material for: Liberation of photogenerated radicals from a nano-titania surface at the solid–air interface
Source: Royal Society of Chemistry journal article supplement (doi:10.1039/d3cy01552a), 2024-01-01
Supplement: d3cy01552a1.pdf [file d3cy01552a1.pdf]

## Supplementary Information

for

### **Liberation of Photogenerated Radicals from Nano Titania Surface at Solid-Air Interface**

K. R. Jaliya Manuda<sup>1</sup>, Nimshi L. Fernando<sup>1,2</sup>, Buddini Nissanka<sup>1</sup>, Aashani Tillekaratne<sup>3</sup>, Dilushan R. Jayasundara<sup>1\*</sup>

<sup>1</sup>Department of Physics, University of Colombo, Colombo 03, Sri Lanka

<sup>2</sup>Department of Chemistry, CINEC Campus (Pvt) Ltd, Malabe, Sri Lanka

<sup>3</sup>Department of Chemistry, University of Colombo, Colombo 03, Sri Lanka

#### **Corresponding Author:**

\*Dilushan R. Jayasundara: [dilushanj@phys.cmb.ac.lk](mailto:dilushanj@phys.cmb.ac.lk)

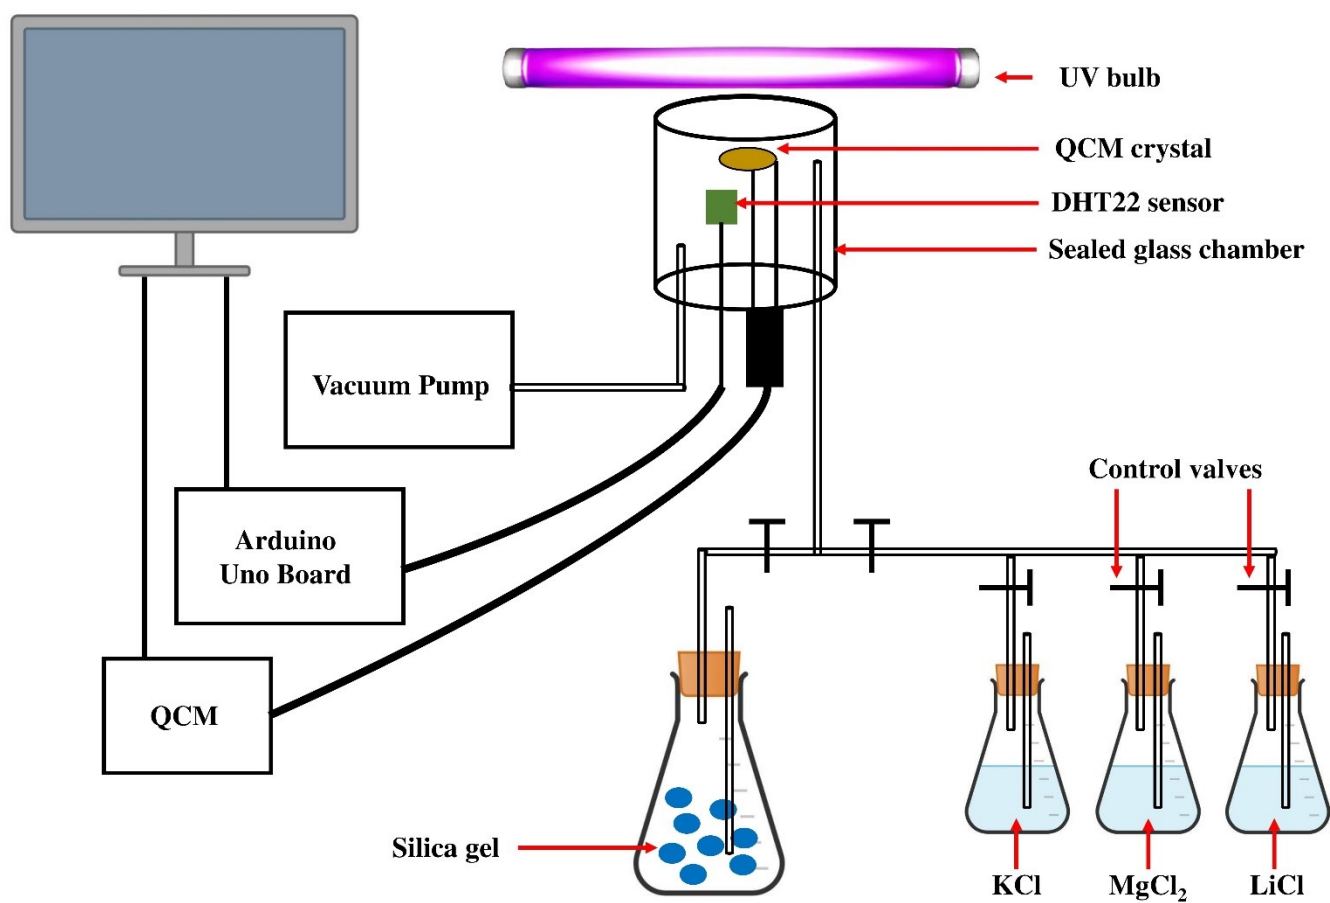

**Fig. S1** The schematic diagram of homemade humidity controlling setup.

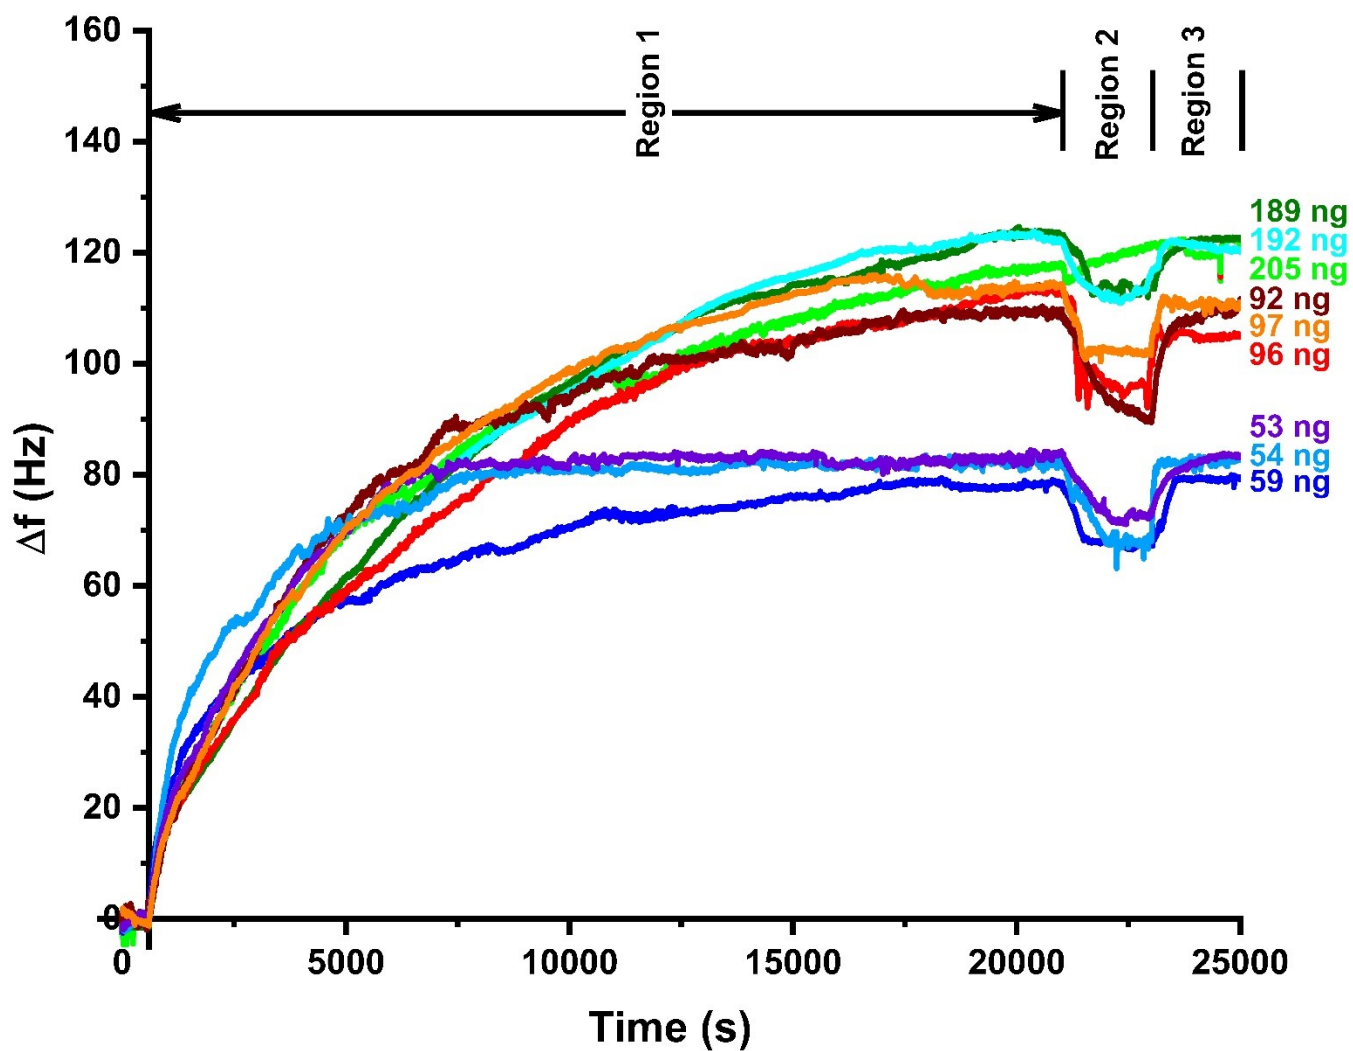

**Fig. S2** Variation of the  $\Delta f$  of MO-55, MO-95, and MO-197 QCMs with irradiation time at 60% RH. Three replicated measurements were carried out for each MO loading. The respective amounts of MO are shown next to each curve.

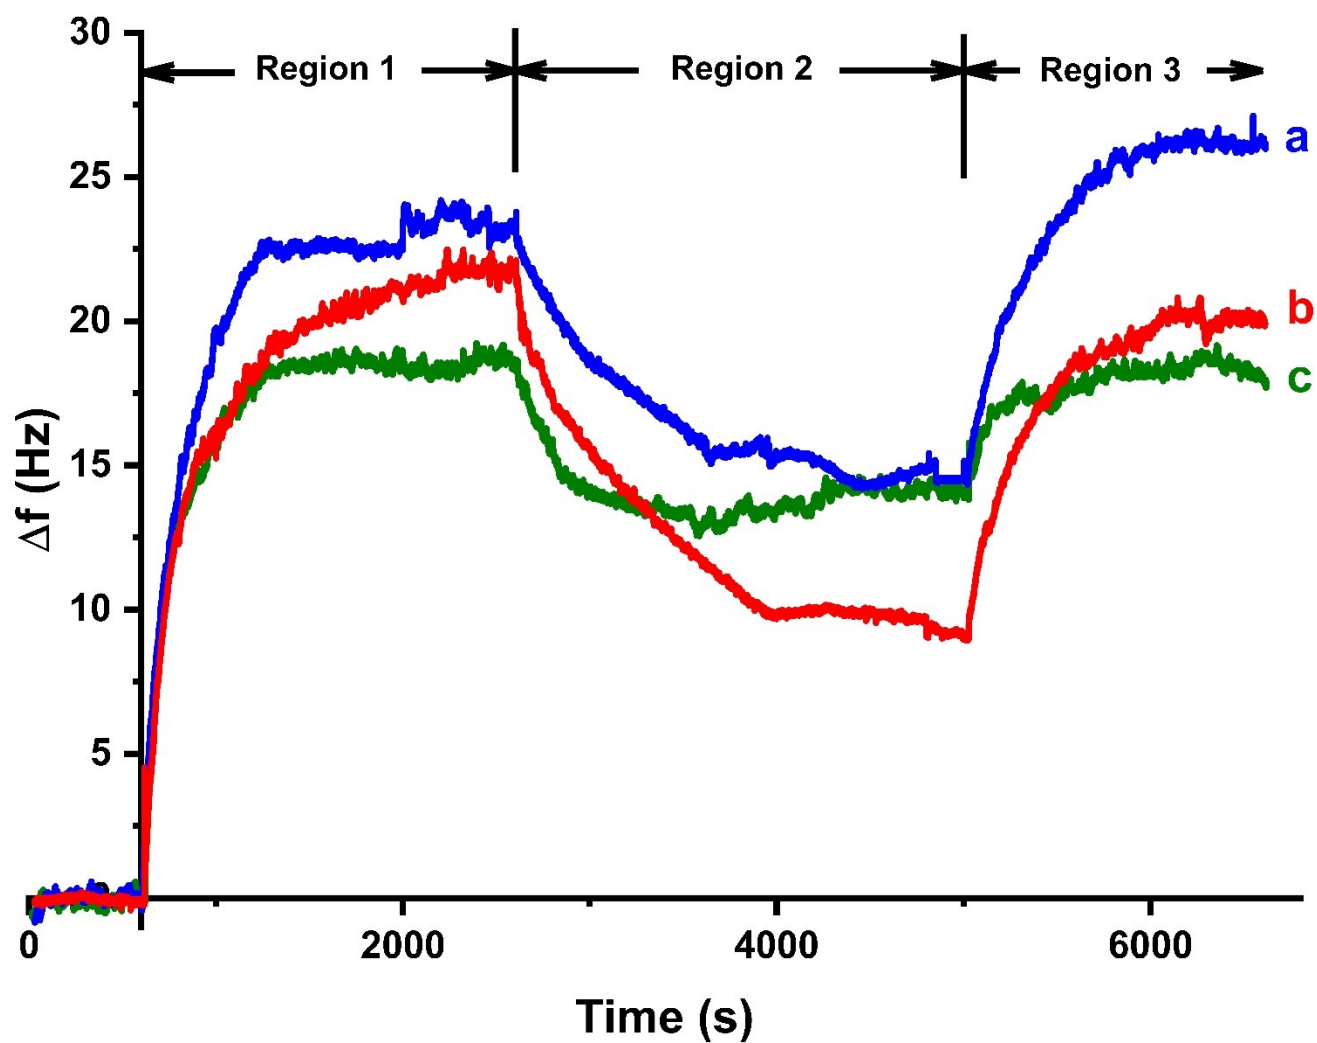

**Fig. S3** Variation of the  $\Delta f$  of  $\text{TiO}_2$  coated QCMs with irradiation time at 60% RH. Three replicated measurements with  $\text{TiO}_2$  loadings of (a) 3018 ng (b) 2994 ng and (c) 2977 ng were carried out.

(a)

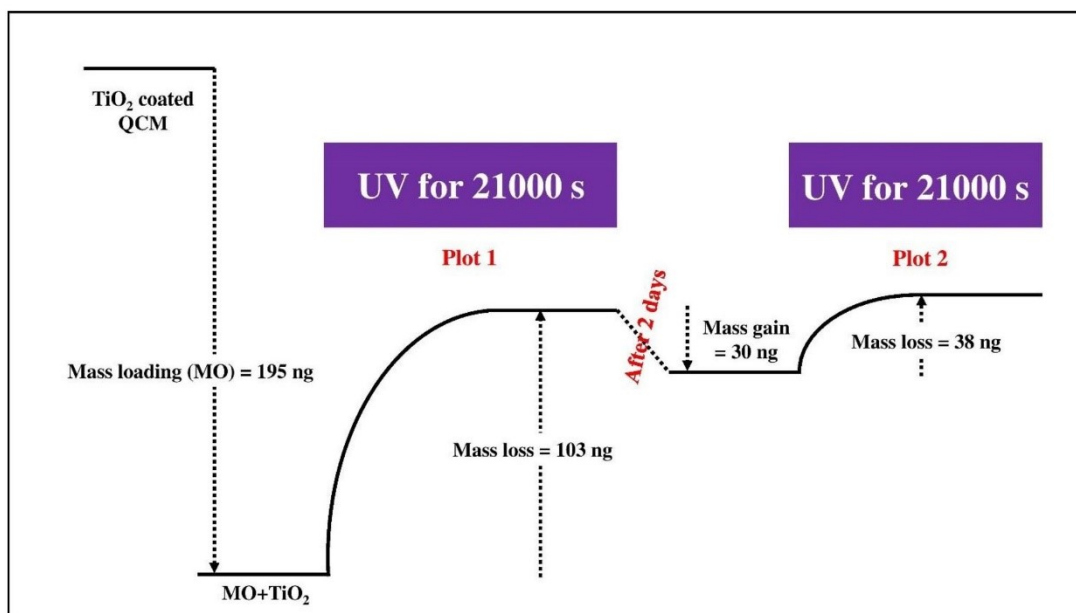

(b)

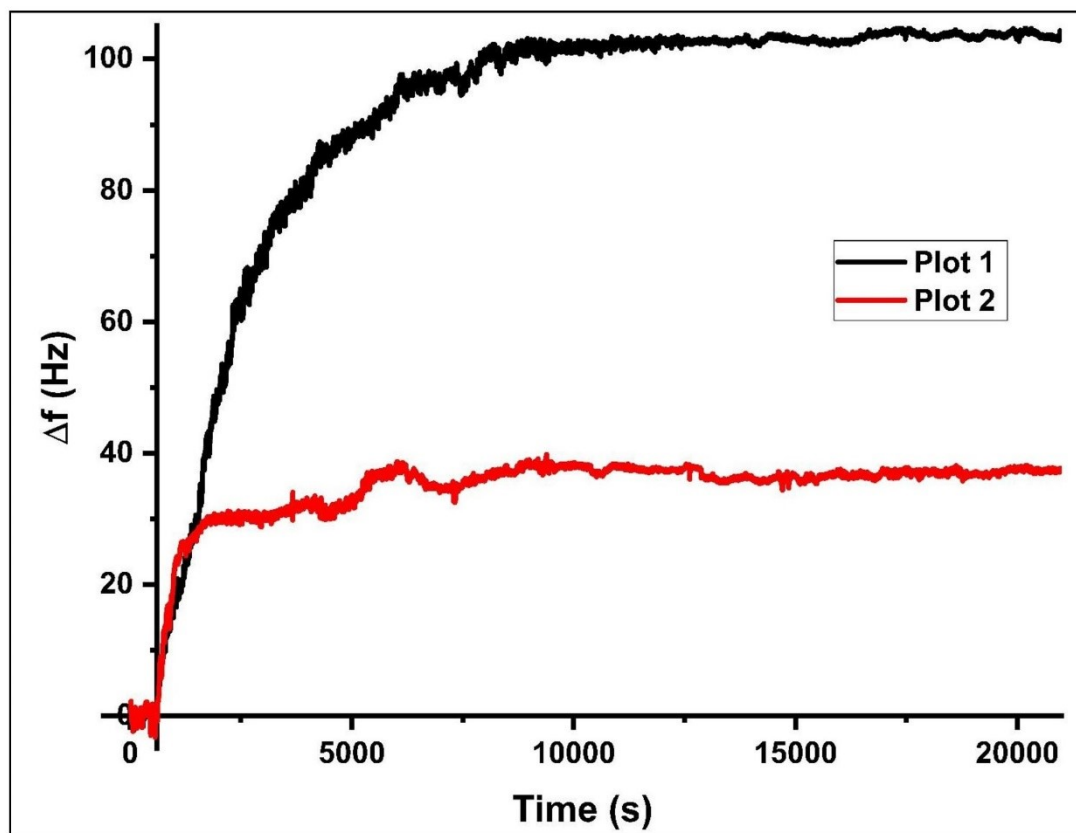

**Fig. S4 (a)** A summary of data of a freshly prepared MO-197 QCM **(b)** the original QCM data plots obtained for the two continuous irradiations.

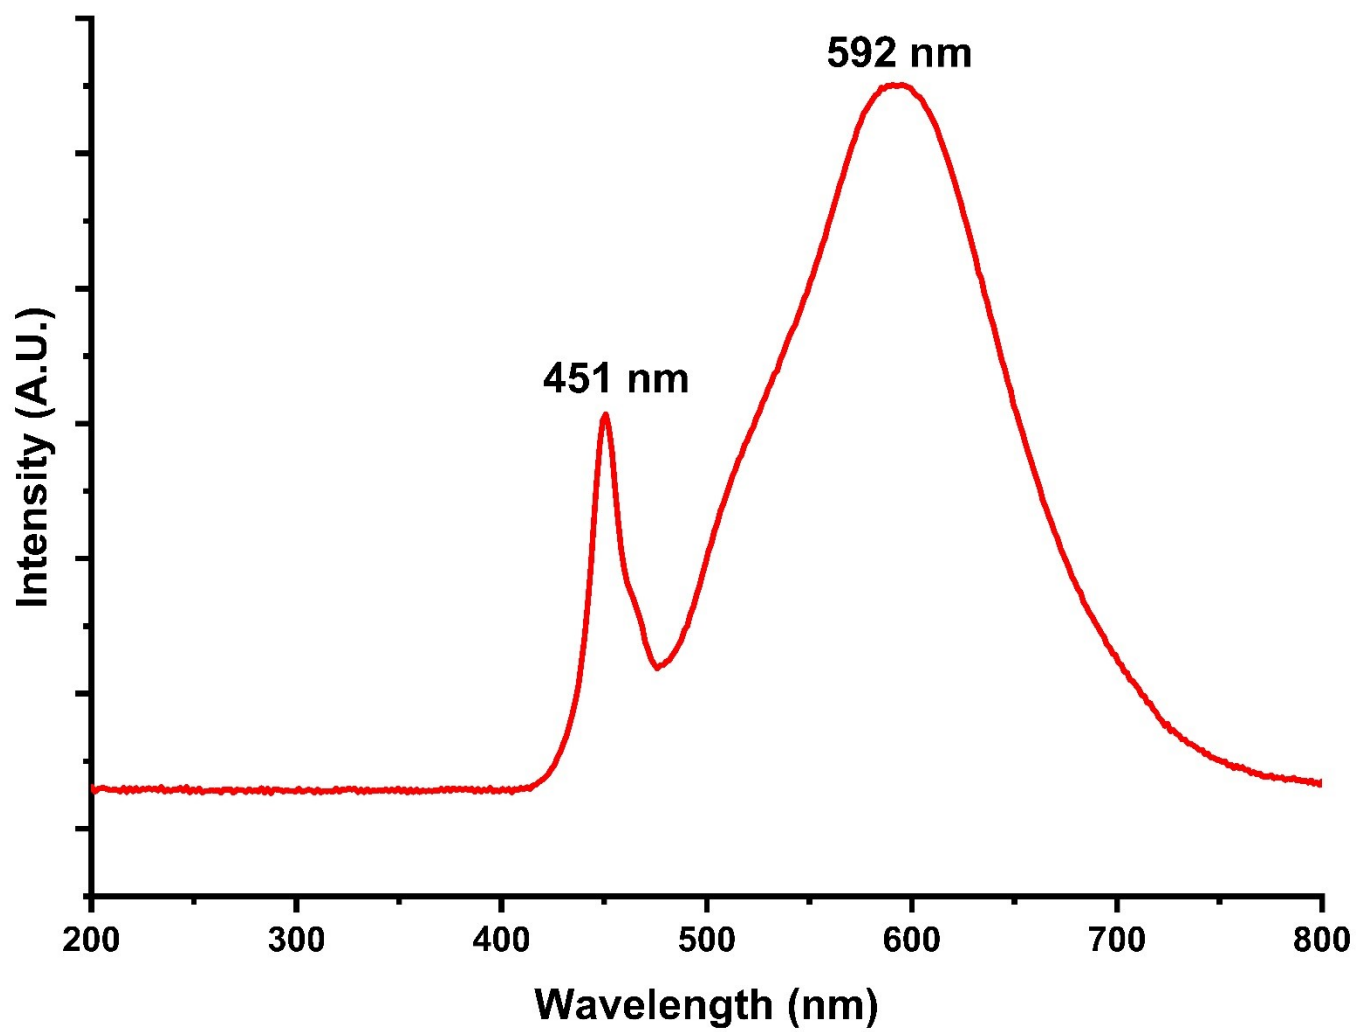

**Fig. S5** The emission spectrum of the visible light source.

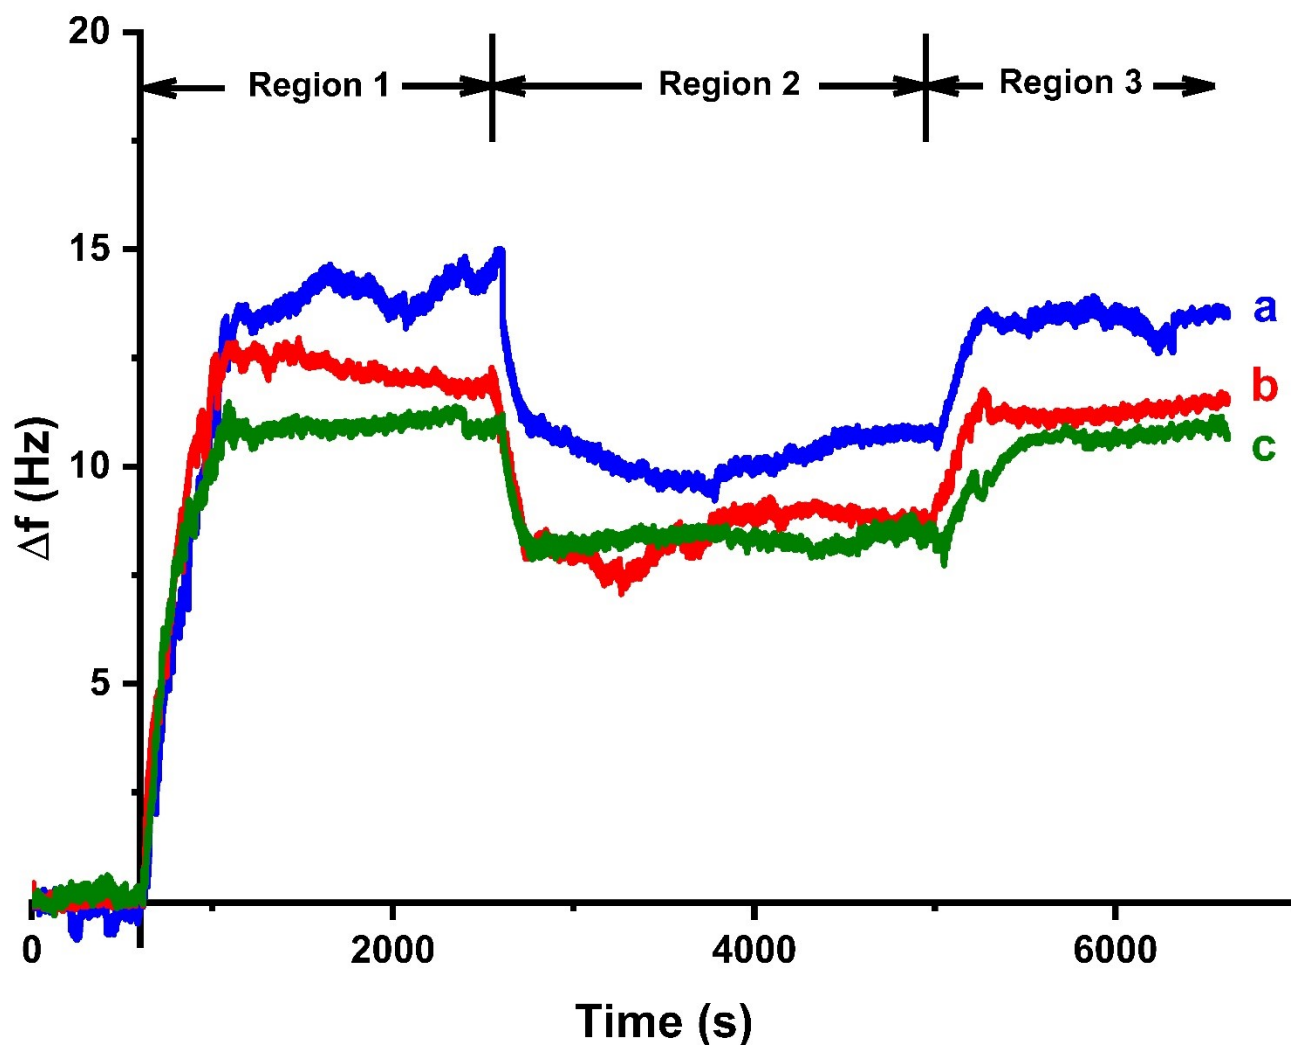

**Fig. S6** Variation of the  $\Delta f$  of MO-55 QCMs with irradiation time at 12% RH. Three replicated measurements with MO loadings of (a) 58 ng (b) 50 ng and (c) 59 ng on  $\text{TiO}_2$  loadings of approximately 3000 ng were carried out.

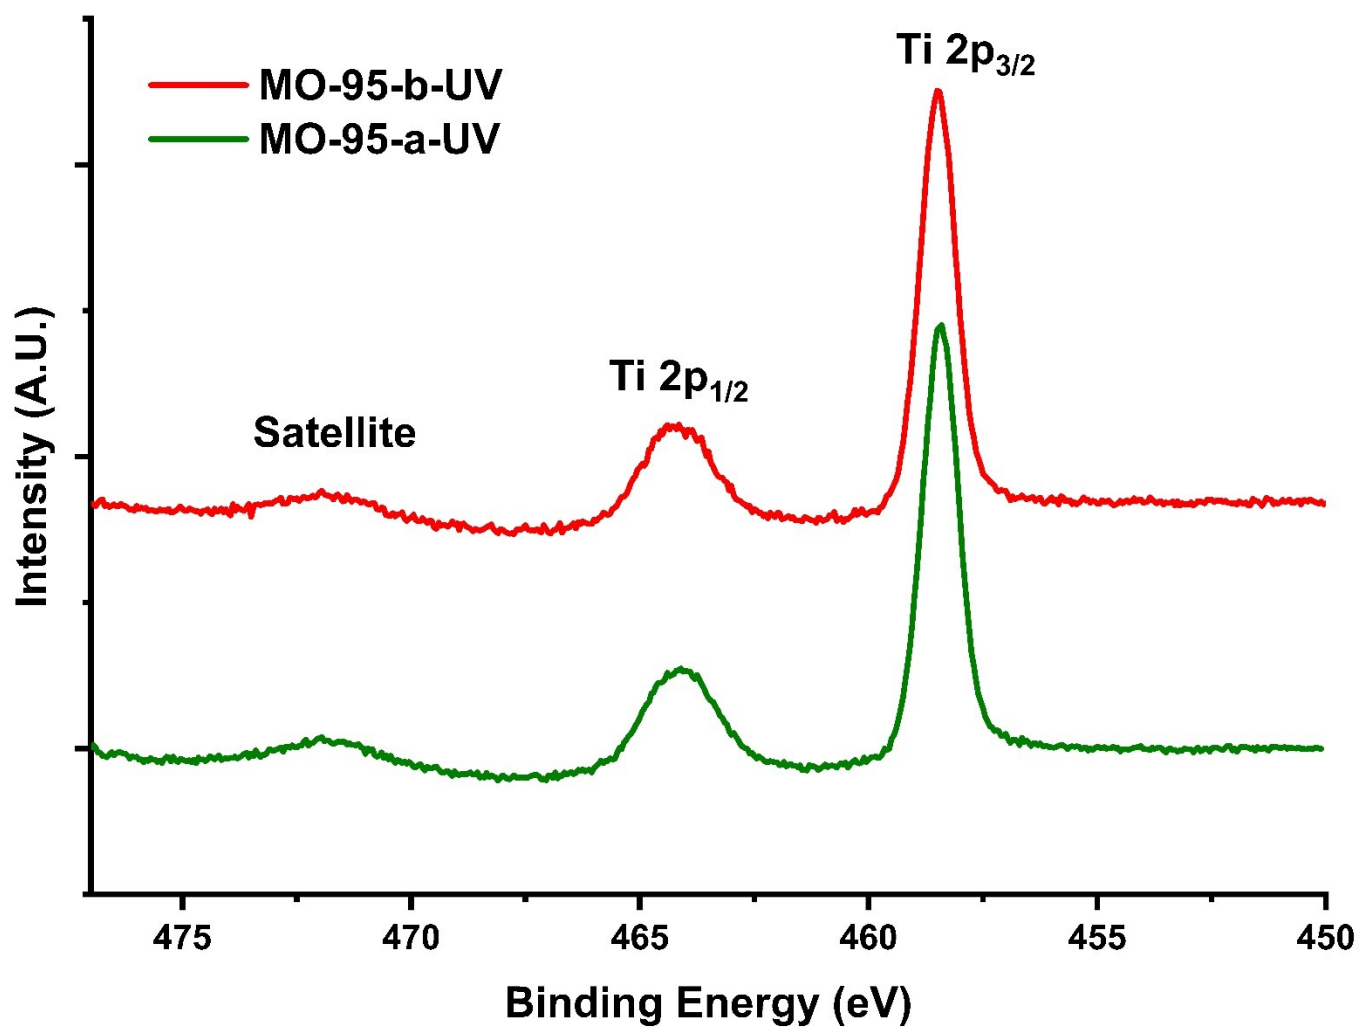

**Fig. S7** High-resolution XPS spectra of Ti 2p region of MO-95-b-UV (top trace), and MO-95-a-UV (bottom trace)
